# Supplementary material for: Localized synthesis of gold nanoparticles in anisotropic alginate structures
Source: Royal Society of Chemistry journal article supplement (doi:10.1039/c4ra02183e), 2014-01-01
Supplement: c4ra02183e1.pdf [file c4ra02183e1.pdf]

Electronic Supplementary Information

## **Localized synthesis of gold nanoparticles in anisotropic alginate structures**

*Elisa Mele,<sup>\*a</sup> George C. Anyfantis,<sup>a</sup> Despina Fragouli,<sup>a</sup> Roberta Ruffilli,<sup>b</sup> and Athanassia Athanassiou<sup>a</sup>*

<sup>a</sup> Nanophysics, Istituto Italiano di Tecnologia (IIT), Via Morego 30, 16163 Genoa, Italy; E-mail:  
elisa.mele@iit.it

<sup>b</sup> Nanochemistry, Istituto Italiano di Tecnologia (IIT), Via Morego 30, 16163 Genoa, Italy

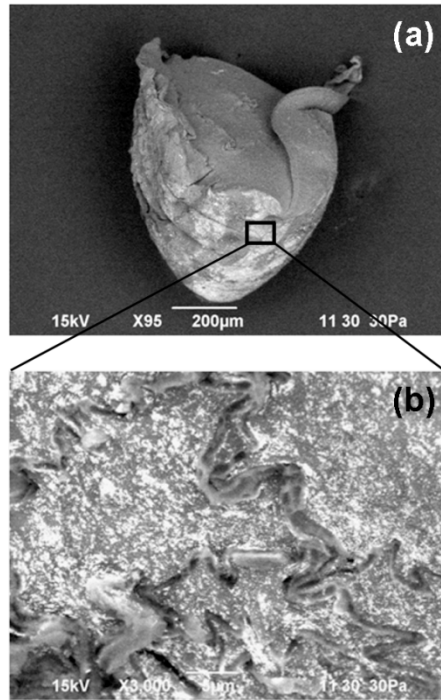

**Figure S1:** Backscattered electron SEM images showing (a) the cross section of the stem of the dried mushroom-like structure, and (b) a detail at high magnification of its surface.
